# Supplementary material for: Combined dehydration/(transfer)-hydrogenation of C6-sugars (D-glucose and D-fructose) to γ-valerolactone using ruthenium catalysts
Source: Royal Society of Chemistry journal article supplement (doi:10.1039/b904693c), 2009-01-01

## Supplementary information to "Combined Dehydration/(transfer)-Hydrogenation of C6-sugars (D-glucose and D-fructose) to $\gamma$ -valerolactone using ruthenium catalysts "

Hans Heeres, Ratna Handana, Dai Chunai, Carolus Borromeus Rasrendra, Buana Girisuta, Hero Jan Heeres\*

Selected HPLC chromatograms of reaction products:

### 1. Conversion of D-Fructose to LA using TFA as the catalyst

0.5 M Fructose, 0.5 M TFA, T=180C, 10 mins

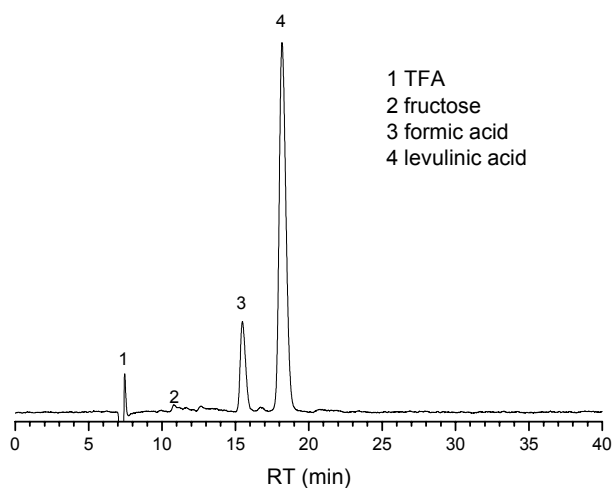

### 2. Conversion of D-Fructose to GVL using hydrogen, TFA as the acid and Ru/C as the hydrogenation catalyst (Table 2, entry 6)

HPLC chromatogram of entry 6, table 2  
(D-Fructose and hydrogen)

1 TFA  
2 fructose  
3 formic acid  
4 acetic acid  
5 levulinic acid  
6 GVL

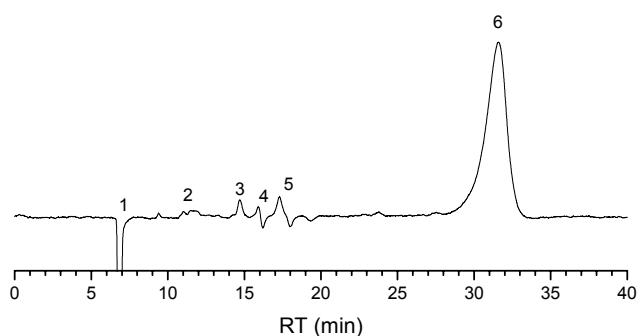

Supplement: b904693c.pdf [file b904693c.pdf]
